# Supplementary material for: Onchocerciasis-associated epilepsy in the Democratic Republic of Congo: Clinical description and relationship with microfilarial density
Source: PubMed Central journal article supplement (PMC6663032; doi:10.1371/journal.pntd.0007300), 2019-07-17
Supplement: pntd.0007300.s002.pdf [file pntd.0007300.s002.pdf]

## Supplementary Material S2

### Multivariate analysis of skin snip positive PWE in Logo (n=143)

|                        | Skin snip positive PWE (Logo) |                 |
|------------------------|-------------------------------|-----------------|
|                        | Adj. IRR (95% CI)             | <i>P</i> -value |
| MF density             | 1.002 (0.999–1.005)           | 0.205           |
| Age                    | 0.995 (0.977–1.016)           | 0.633           |
| Female gender          | 0.466 (0.284–0.765)           | <b>0.001</b>    |
| Previous AED treatment | 0.648 (0.371–1.114)           | 0.091           |

*MF: Microfilariae*

*AED: Anti-epileptic drug*

*Adj. IRR: Adjusted incidence risk ratio*

*CI: Confidence interval*
